# Supplementary material for: Indirect pathological indicators for cardiac sarcoidosis on endomyocardial biopsy
Source: PubMed Central journal article supplement — J Pathol Transl Med. 2020 Jul 29;54(5):396–410. doi: 10.4132/jptm.2020.06.10 (PMC7483025; doi:10.4132/jptm.2020.06.10), 2020-07-29
Supplement: jptm-2020-06-10-suppl1.pdf [file jptm-2020-06-10-suppl1.pdf]

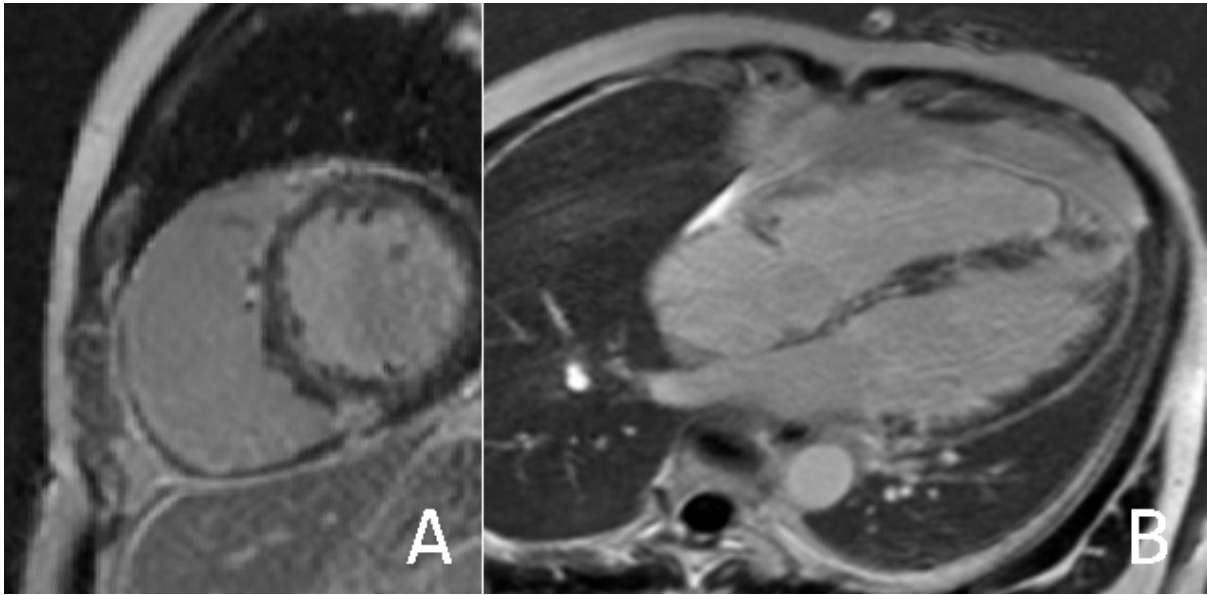

**Supplementary Fig. S1.** Cardiac magnetic resonance imaging (MRI) of cardiac sarcoidosis in case 5. The MRI of the first transplant case shows subepicardial linear myocardial enhancement at the left ventricular basal anterior and anteroseptal wall and focal patchy enhancement at the basal inferoseptal wall. Right ventricular multifocal subendocardial enhancement is also suspected. Imaging features are compatible with cardiac sarcoidosis.
