# Supplementary material for: Indirect pathological indicators for cardiac sarcoidosis on endomyocardial biopsy
Source: PubMed Central journal article supplement — J Pathol Transl Med. 2020 Jul 29;54(5):396–410. doi: 10.4132/jptm.2020.06.10 (PMC7483025; doi:10.4132/jptm.2020.06.10), 2020-07-29
Supplement: jptm-2020-06-10-suppl2.pdf [file jptm-2020-06-10-suppl2.pdf]

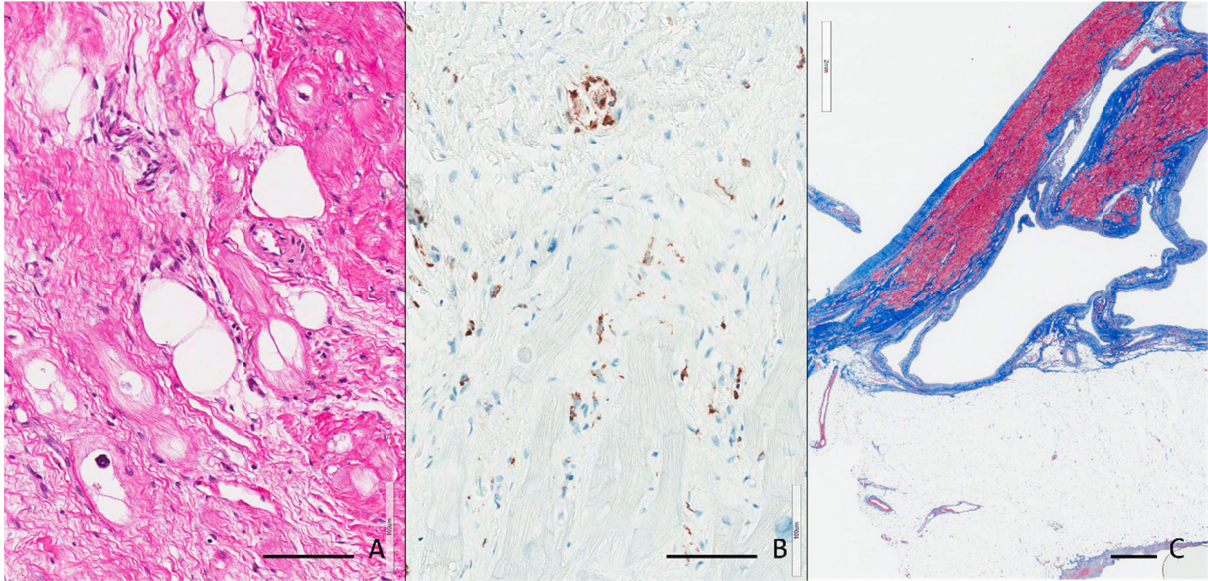

**Supplementary Fig. S2.** Microscopic details of cardiac sarcoidosis in the first transplant heart. (A) High magnification of the myocardium at the right ventricular trabeculae reveals vague nodules of granuloma-like lesions and fatty transformation of the myocardium. (B) Immunohistochemical staining for CD68 in the same area shows a small nodular collection of eleven histiocytes. (C) Magnification the right ventricular free wall at the apex reveals absence of myocardium in the free wall but a thin layer of fibrotic wall is covered by epicardial fatty tissue. The myocardium stained violet is seen only in the trabeculae.
