# Supplementary material for: Indirect pathological indicators for cardiac sarcoidosis on endomyocardial biopsy
Source: PubMed Central journal article supplement — J Pathol Transl Med. 2020 Jul 29;54(5):396–410. doi: 10.4132/jptm.2020.06.10 (PMC7483025; doi:10.4132/jptm.2020.06.10), 2020-07-29
Supplement: jptm-2020-06-10-suppl4.pdf [file jptm-2020-06-10-suppl4.pdf]

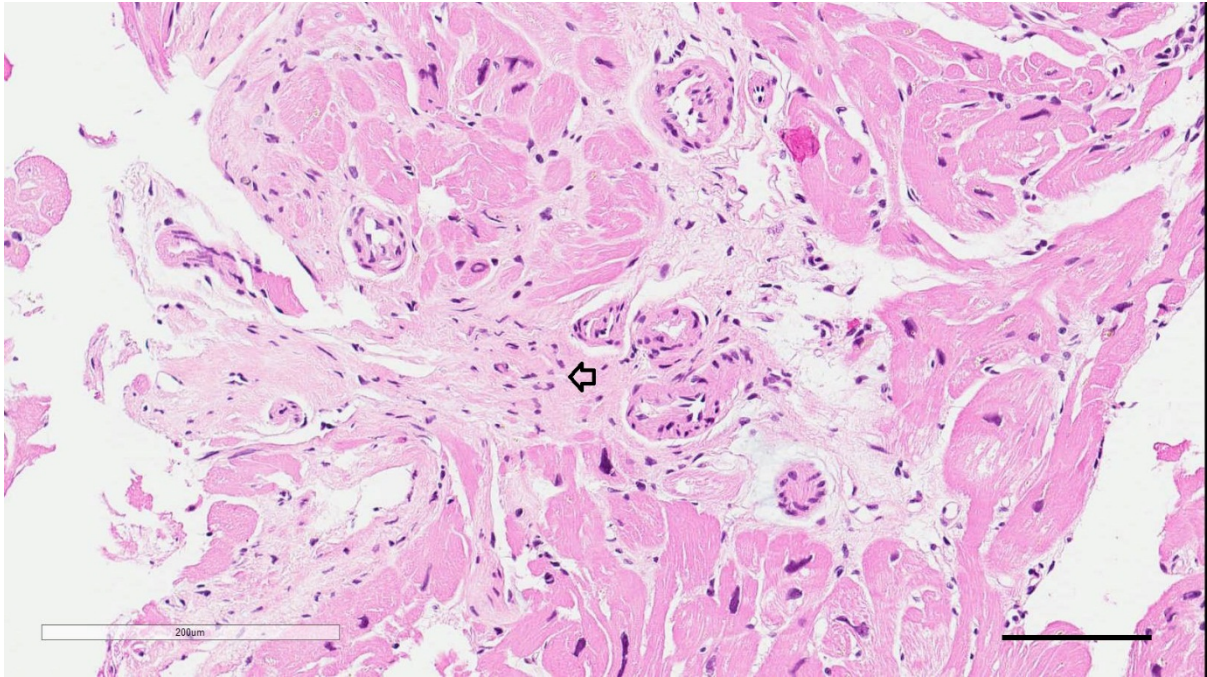

**Supplementary Fig. S4.** Microscopic details of cardiac sarcoidosis in the second transplant heart. Endomyocardial biopsy before the transplantation shows confluent fibrosis with edematous stroma. A single focus of equivocal granuloma (arrow) is seen in the interstitium.
